# Supplementary material
Source: Springer Nature journal article supplement (https://www.springermedizin.de/resource/supplementary/12876_2010_521_MOESM1_ESM.pdf/9436908)

**D2-40  
Control**

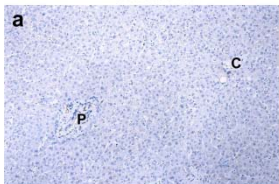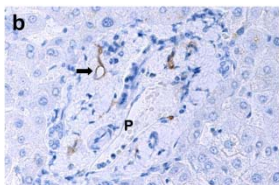

**CD34  
Control**

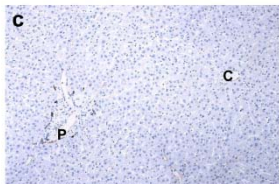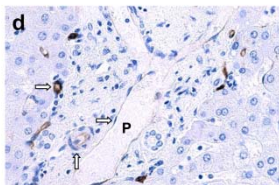

**D2-40  
Child A-LC**

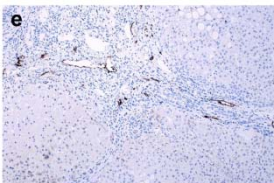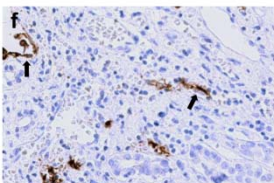

**CD34  
Child A-LC**

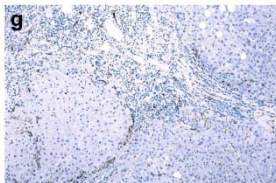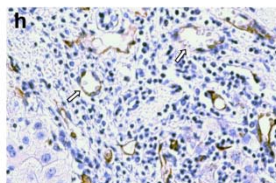

**D2-40  
Child C-LC**

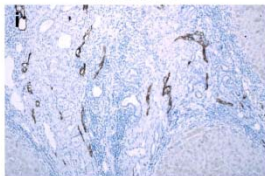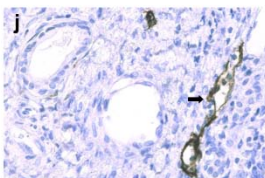

**CD34  
Child C-LC**

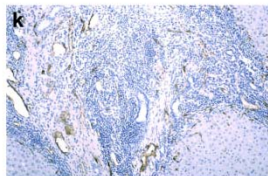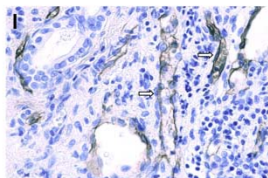

Supplement: MOESM1 [file 9436908]
